# Supplementary material for: Big Genomes Facilitate the Comparative Identification of Regulatory Elements
Source: PubMed Central journal article supplement (PMC2650094; doi:10.1371/journal.pone.0004688), 2009-03-04
Supplement: pone.0004688.s001.pdf [file pone.0004688.s001.pdf]

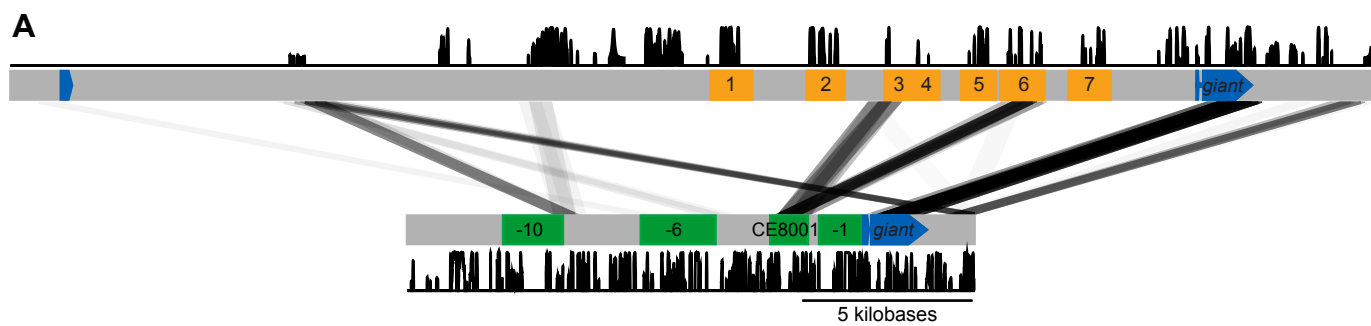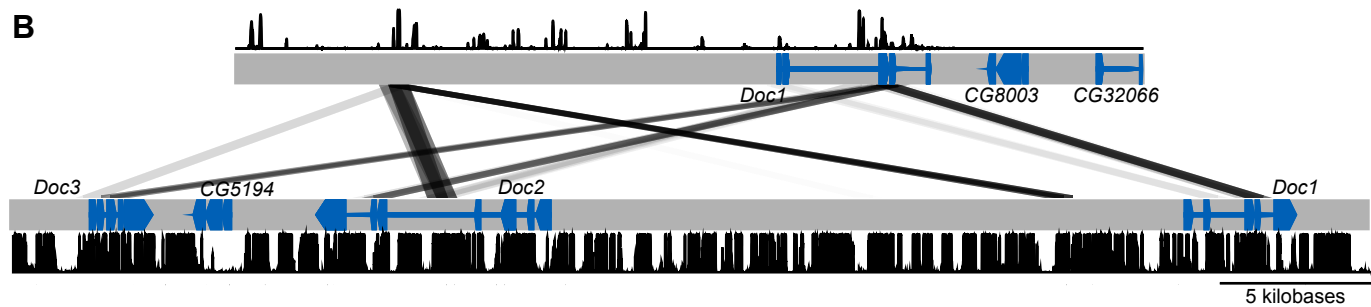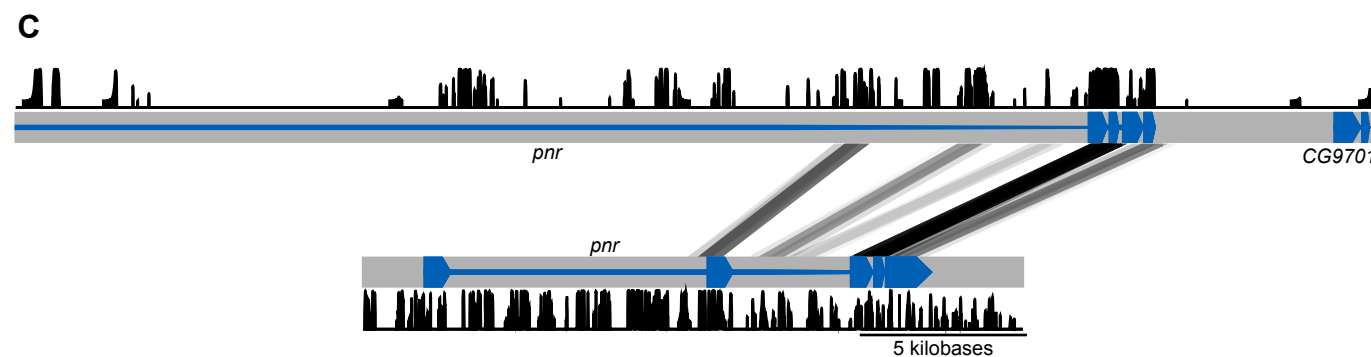

Supplemental Figure 2
